# Supplementary material
Source: PubMed Central journal article supplement (PMC8206198)
Supplement: mmc1.pdf [file mmc1.pdf]

**The American Journal of Human Genetics, Volume 108**

**Supplemental information**

**Impaired cholesterol efflux in retinal pigment  
epithelium of individuals  
with juvenile macular degeneration**

**Yi-Ting Tsai, Yao Li, Joseph Ryu, Pei-Yin Su, Chia-Hua Cheng, Wen-Hsuan Wu, Yong-Shi Li, Peter M.J. Quinn, Kam W. Leong, and Stephen H. Tsang**

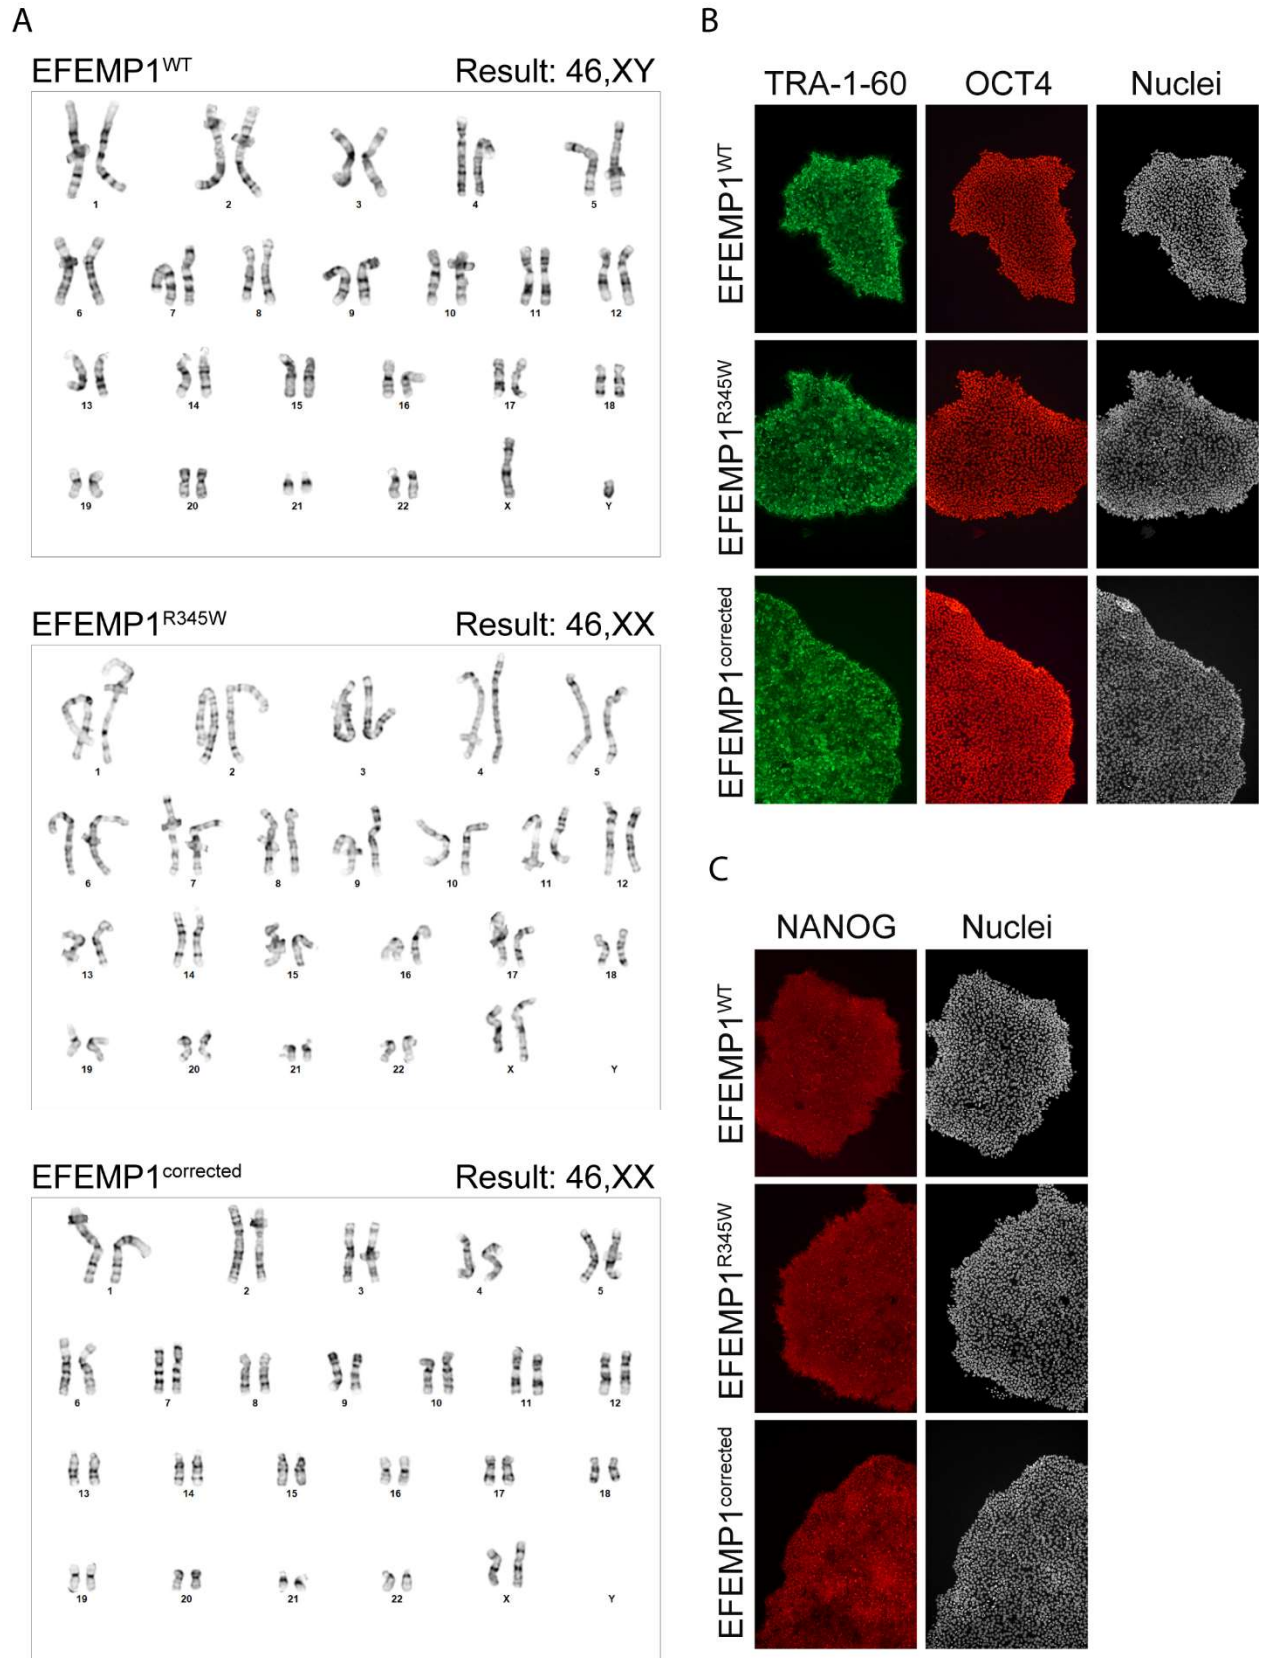

**Figure S1. Characterization of iPSC cells. (A)** Karyotyping result of the EFEMP1<sup>WT</sup>, EFEMP1<sup>R345W</sup> and EFEMP1<sup>corrected</sup> iPSCs. **(B)** Immunostaining of stem cells markers TRA-1-60 and OCT4. **(C)** Immunostaining of stem cells marker NANOG.

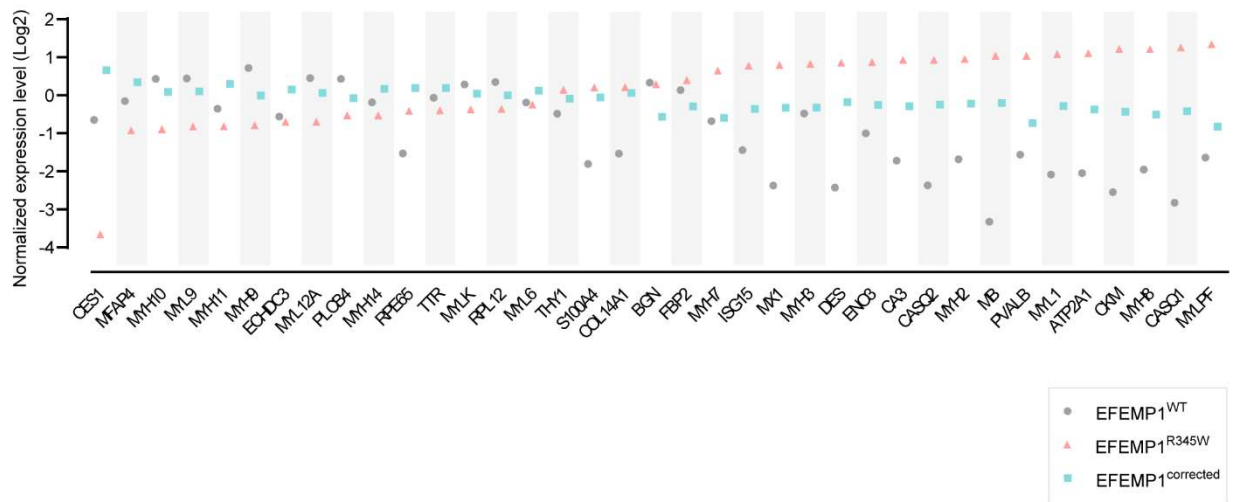

**Figure S2. Proteomic analysis of iRPE cells.** Expression level of the 37 DEPs shown in Fig. 2(A) determined by mass spectrometry. The order of the proteins is ranked by the mean expression level of the diseased group. EFEMP1<sup>WT</sup> (n=6), EFEMP1<sup>R345W</sup> (n=6), and EFEMP1<sup>corrected</sup> clones (n=6).

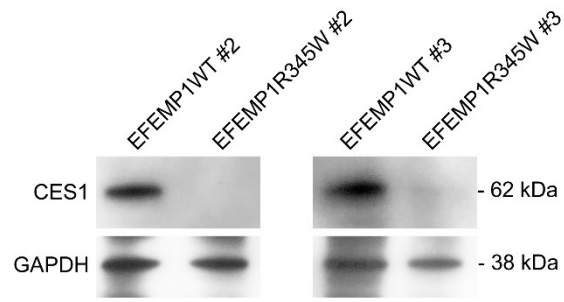

**Figure S3. Expression of CES1 in two healthy donor and two DHRD patient iRPE cells.** The cell lysates from iRPE derived from healthy donor #2, #3 and DHRD patient #2, #3 were determined by western blot.

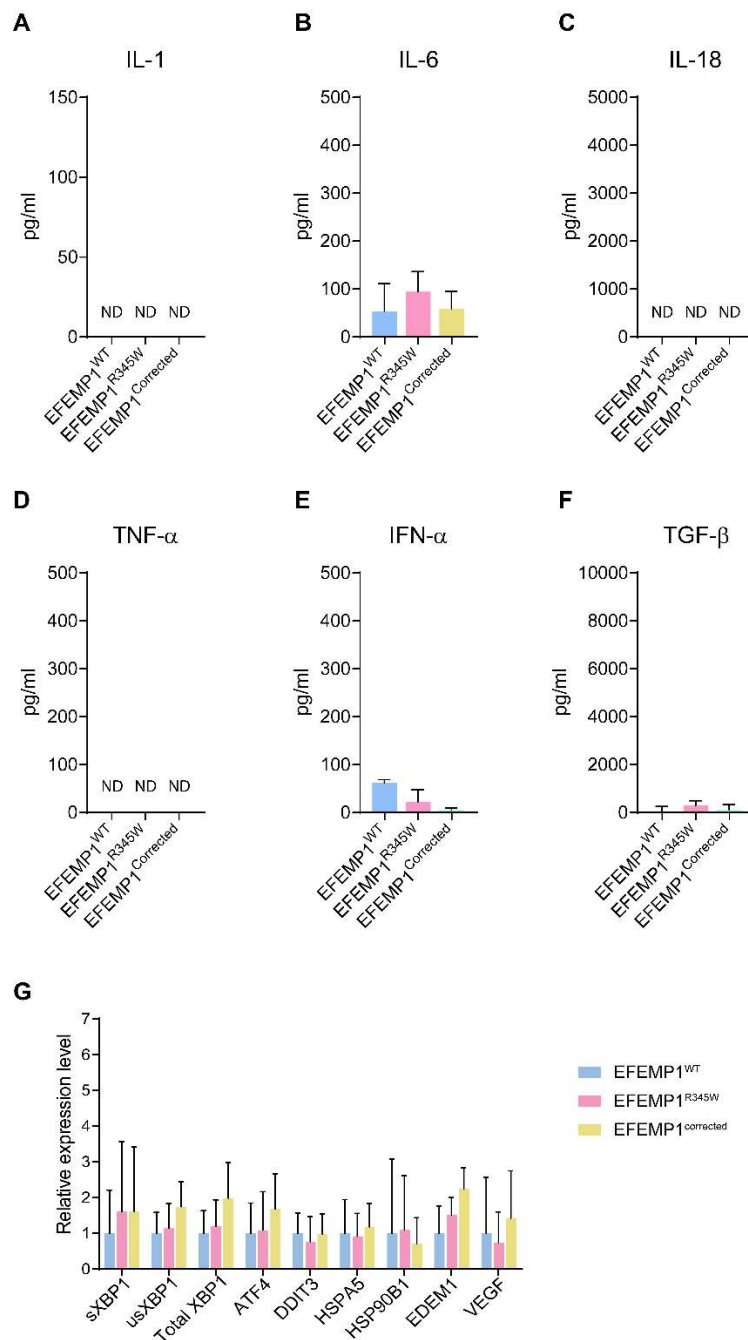

**Figure S4. Absence of cytokine changes and UPR in DHRD patient-derived iRPE cells.** (A) IL-1, (B) IL-6, (C) IL-18, (D) TNF-alpha, (E) IFN-alpha and (F) TNF-beta cytokine level in the supernatant of EFEMP1<sup>WT</sup> (n=12), EFEMP1<sup>R345W</sup> (n=12), and EFEMP1<sup>corrected</sup> (n=16) iRPE cell cultures. One-way ANOVA analysis showed no significant differences between the groups. Note: The scale range of each graph was set according to the range of the standard provided in the respective ELISA kits by the manufacturer. (G) Real-time PCR analysis of UPR-related gene expression level in EFEMP1<sup>WT</sup> (n=5), EFEMP1<sup>R345W</sup> (n=6), and EFEMP1<sup>Corrected</sup> (n=8) iRPE cells. Geometric mean and standard deviation were used to determine the p-values. Data represented as geometric mean  $\pm$  geometric SD. One-way ANOVA analysis showed no significant differences between the groups.

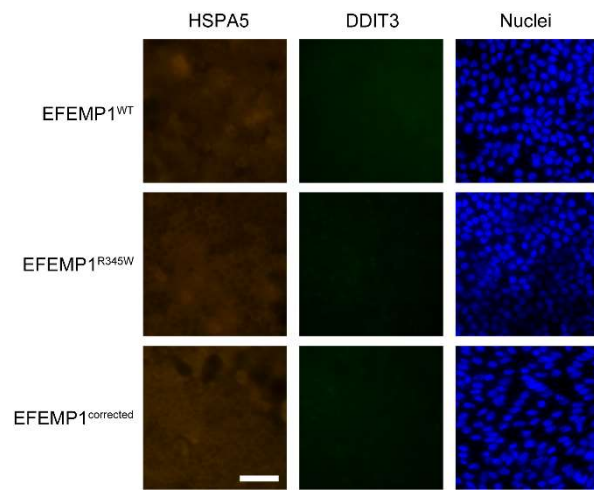

**Figure S5. Immunocytochemistry of UPR markers.** The staining of HSPA5 (left column) and DDIT3 (middle column) of the EFEMP1<sup>WT</sup>, EFEMP1<sup>R345W</sup> and EFEMP1<sup>corrected</sup> iRPE.

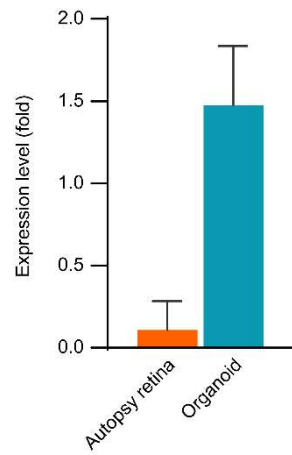

**Figure S6. Relative expression of CES1 in retina.** The CES1 mRNA level in of retina tissue derived from human autopsy and human iPSC-derived retinal organoid were determined by qPCR. The data is presented as the ratio of the level in retina/the level in RPE. Data represented as geometric mean  $\pm$  geometric SD. (n=2)

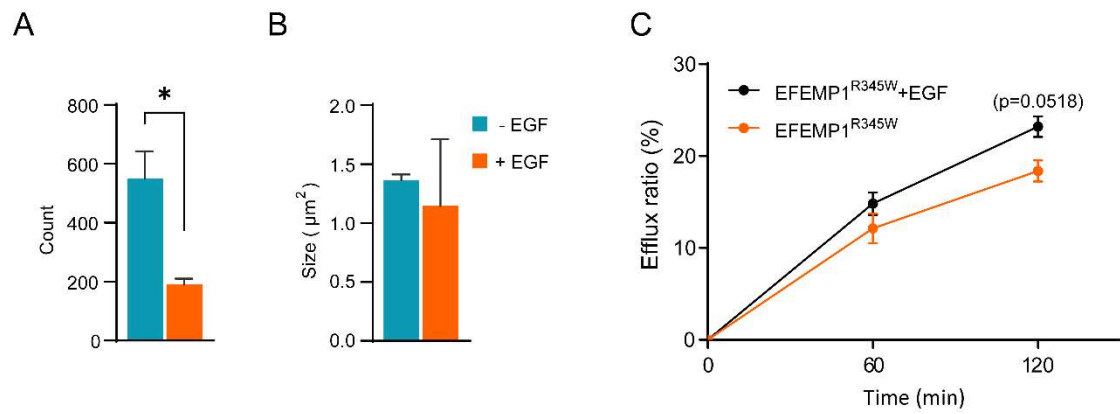

**Figure S7. EGF treatment ameliorates intracellular lipid droplet accumulation and improve cholesterol efflux in EFEMP1<sup>R345W</sup> iRPE. (A, B)** The amount (A) and size (B) of the lipid droplet detected in EFEMP1<sup>R345W</sup> iRPE with or without the treatment of 100 mM EGF for two weeks. **(C)** The cholesterol efflux of EGF-treated or untreated EFEMP1<sup>R345W</sup> iRPE. Data represented as mean ± SD. (n=2)



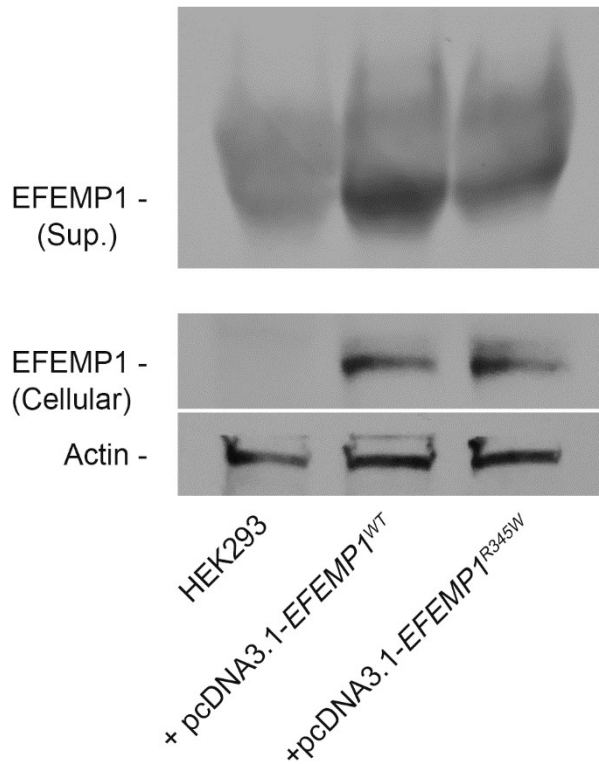

**Figure S8. Overexpression of EFEMP1 in HEK293 cells.** The HEK293 cells were transfected with pcDNA3.1 vector expressing either EFEMP1<sup>WT</sup> or EFEMP1<sup>R345W</sup> for 96 hours. The expression of EFEMP1 in cell lysate or culture supernatant was verified by western blot. HEK293 cell without plasmid transfection was used as a negative control.

| #  | Off-target             | PAM | Mismatch | Loci             | Sanger sequencing result |
|----|------------------------|-----|----------|------------------|--------------------------|
| 1  | TAGCACAAATCAATGCTGGG   | TGG | 3        | chr6:-51829175   | Negative                 |
| 2  | GTTACACAAATGTATGCTGGG  | GAG | 3        | chr22:-23917811  | Negative                 |
| 3  | GACCTCAGATGCATGCTGGG   | TGG | 3        | chr1:+211488904  | Negative                 |
| 4  | CTCCACAAATGATTGCTGGG   | TAG | 3        | chr9:-27217596   | Negative                 |
| 5  | GATCACAAAGTGCAATGCTGGG | AGG | 3        | chr16:+64364365  | Negative                 |
| 6  | GACAAGAAATGTATGCTGGG   | AGG | 3        | chr10:+29247481  | Negative                 |
| 7  | CAAGGCAAATGAATGCTGGG   | AGG | 4        | chr14:+58766092  | Negative                 |
| 8  | AATCACTCATGAATGCTGGG   | TAG | 4        | chr17:-61036661  | Negative                 |
| 9  | GAGTTCTAATGAATGCTGGG   | GAG | 4        | chr1:-229986223  | Negative                 |
| 10 | GACTGCAGGTGAATGCTGGG   | AAG | 4        | chr10:-122044509 | Negative                 |
| 11 | AAGAACAAATGAATGCTGGT   | TAG | 4        | chr18:-69036600  | Negative                 |

**Table S1. Off-targeting analysis of gene-corrected iPSC clone.** The genomic DNA of EFEMP1<sup>corrected</sup> iPSC clone was extracted after CRISPR engineering. The 11 loci that resemble the protospacer used for gene correction were amplified by PCR and analyzed by Sanger sequencing. The mismatched nucleotides are marked in red.

| Gene          | Direction | Sequence (5'-3')        |
|---------------|-----------|-------------------------|
| sXBP1         | F         | CTGAGTCCGAATCAGGTGCAG   |
|               | R         | ATCCATGGGGAGATGTTCTGG   |
| usXBP1        | F         | CAGCACTCAGACTACGTGCA    |
|               | R         | ATCCATGGGGAGATGTTCTGG   |
| Total XBP1    | F         | TGGCCGGGTCTGCTGAGTCCG   |
|               | R         | ATCCATGGGGAGATGTTCTGG   |
| ATF4          | F         | GTTCTCCAGCGACAAGGCTA    |
|               | R         | ATCCTGCTTGCTGTTGTTGG    |
| DDIT3         | F         | AGAACCAGGAAACGGAACAGA   |
|               | R         | TCTCCTTCATGCGCTGCTTT    |
| HSPA5         | F         | TGTTCAACCAATTATCAGCAAAC |
|               | R         | TTCTGCTGTATCCTCTTCACCA  |
| HSP90B1       | F         | GAAACGGATGCCTGGTGG      |
|               | R         | GCCCCCTTCTTCTGGGTC      |
| EDEM1         | F         | CAAGTGTGGGTACGCCACG     |
|               | R         | AAAGAAGCTCTCCATCCGGTC   |
| VEGF          | F         | TGCAGATTATGCGGATCAAACC  |
|               | R         | TGCATTACATTTGTTGTGCTG   |
| ABCA1         | F         | CCCTGAATCTCACCAAGCAGC   |
|               | R         | CGCTCCTGGATCAGGAATACG   |
| ABCG1         | F         | TACTTGGGGATCGGGAACGAA   |
|               | R         | AAAGACTCCCATCTCCAGGGG   |
| SREBF2        | F         | GAGATCCATCTGACTGCTGCC   |
|               | R         | AGGGAGTCAGGAACAGCACT    |
| CETP          | F         | GTCAATGATCACCGCTGTGGG   |
|               | R         | CCTTTGCTGTTTCATGAGGGCT  |
| SIRT1         | F         | AGCAGATTAGTAGGCGGCTTG   |
|               | R         | CCTCAGCGCCATGGAAAATGTA  |
| ACTB          | F         | TCCACCTTCCAGCAGATGTG    |
|               | R         | GCATTTGCGGTGGACGAT      |
| CES1          | F         | GTTGGGCAAGTTTACAGCTCTC  |
|               | R         | CTCCCTGGGCTTCTAGTGG     |
| CES1 promoter | F         | TGGTGTCCCATCTGTGATTGT   |
|               | R         | CTGATGAGAAGCTTGGACGGT   |

**Table S2. Primers used for real-time qPCR.**

|         | EFEMP1 <sup>WT</sup> | EFEMP1 <sup>R345W</sup> | EFEMP1 <sup>corrected</sup> |
|---------|----------------------|-------------------------|-----------------------------|
| CES1    | 0.637167             | 0.079250                | 1.580444                    |
| MYLPF   | 0.320667             | 2.538000                | 0.562722                    |
| PVALB   | 0.338333             | 2.058667                | 0.603778                    |
| MYH8    | 0.258000             | 2.316917                | 0.700889                    |
| CASQ1   | 0.141000             | 2.387500                | 0.747556                    |
| CKM     | 0.171167             | 2.314834                | 0.739778                    |
| ATP2A1  | 0.241750             | 2.153625                | 0.773250                    |
| MYL1    | 0.235500             | 2.121667                | 0.820000                    |
| MFAP4   | 0.900000             | 0.526583                | 1.266278                    |
| MYH7    | 0.623167             | 1.568750                | 0.662778                    |
| MB      | 0.099500             | 2.057500                | 0.869556                    |
| CA3     | 0.303000             | 1.901917                | 0.817667                    |
| CASQ2   | 0.193667             | 1.908417                | 0.842000                    |
| MYH2    | 0.311833             | 1.931834                | 0.858944                    |
| MYH3    | 0.717667             | 1.774250                | 0.801222                    |
| ISG15   | 0.367500             | 1.714250                | 0.777833                    |
| ENO3    | 0.499833             | 1.827833                | 0.837333                    |
| MX1     | 0.192667             | 1.735334                | 0.798167                    |
| MYH11   | 0.780667             | 0.566500                | 1.231334                    |
| DES     | 0.185667             | 1.810750                | 0.883166                    |
| MYH10   | 1.348500             | 0.537417                | 1.059666                    |
| MYL9    | 1.356000             | 0.564667                | 1.074500                    |
| ECHDC3  | 0.677500             | 0.615250                | 1.112333                    |
| BGN     | 1.260000             | 1.220900                | 0.675422                    |
| MYH9    | 1.645833             | 0.578417                | 0.997111                    |
| MYL12A  | 1.364500             | 0.615750                | 1.041222                    |
| MYH14   | 0.877833             | 0.692667                | 1.125500                    |
| FBP2    | 1.097167             | 1.318334                | 0.814833                    |
| RPE65   | 0.345833             | 0.751667                | 1.140167                    |
| TTR     | 0.956000             | 0.759834                | 1.140222                    |
| PLCB4   | 1.345200             | 0.692100                | 0.949122                    |
| MYLK    | 1.217000             | 0.772667                | 1.028778                    |
| MYL6    | 0.876833             | 0.844417                | 1.084833                    |
| RPL12   | 1.273667             | 0.778500                | 0.998944                    |
| S100A4  | 0.286000             | 1.154583                | 0.962945                    |
| THY1    | 0.715167             | 1.103167                | 0.937778                    |
| COL14A1 | 0.344167             | 1.158334                | 1.041389                    |

**Table S3. Normalized MS/MS result of the 37 DEs shown in Figure S2.**
